# Supplementary material for: 30 Years of Air Quality Trends in Japan
Source: MDPI journal article supplement (doi:10.3390/atmos12081072), 2021-08-21
Supplement: s1 [file s1]

# Supplement to "30 Years of Air Quality Trends in Japan"

Akiyoshi Ito <sup>1,\*</sup>, Shinji Wakamatsu <sup>2</sup>, Tazuko Morikawa <sup>3</sup> and Shinji Kobayashi <sup>4</sup>

<sup>1</sup> Japan Automobile Research Institute, 2530 Karima, Tsukuba, Ibaraki, Japan; aito@jari.or.jp

<sup>2</sup> Institute of Integrated Atmospheric Environment (IIAE), Professor emeritus of Ehime University, Ehime 790-8566, Japan; wakamatu@agr.ehime-u.ac.jp

<sup>3</sup> Japan Automobile Research Institute, 2530 Karima, Tsukuba, Ibaraki, Japan; tmorikaw@jari.or.jp

<sup>4</sup> National Institute for Environmental Studies (NIES), Tsukuba, Ibaraki, Japan; shinji@dog.email.ne.jp

\* Correspondence: aito@jari.or.jp (Akiyoshi Ito)

## S1. Air quality standard in Japan, US and Europe and WHO guidelines

Table S1-1 shows the limit values and the date of notification of Japan's air quality standards and also shows the number of stations complying with the air quality standards as of 2018 [S1]. According to this table, the compliance rate of SPM, NO<sub>2</sub>, SO<sub>2</sub>, and CO standards have achieved almost 100% for both AAQMS and RsAQMS. On the other hand, for PM<sub>2.5</sub>, 93.5% of AAQMS (765 out of 818 stations) and 93.1% of RsAQMS (216 out of 232 stations) have not reached 100%. For O<sub>3</sub>, the compliance rate is almost 0% for both AAQMS (1 out of 1,155 stations) and RsAQMS (0 out of 28 stations).

**Table S1-1.** Limit values and notification dates of air quality standards in Japan and the number of stations complying with the standards in 2018

| Species           | Unit              | Air Quality Standard |       |        | Notification date | # of attainment stations (all stations) (1) |           |
|-------------------|-------------------|----------------------|-------|--------|-------------------|---------------------------------------------|-----------|
|                   |                   | Annual               | Daily | Hourly |                   | AAQMS                                       | RsAQMS    |
| PM <sub>2.5</sub> | µg/m <sup>3</sup> | 15                   | 35    |        | September 9, 2009 | 765 (818)                                   | 216 (232) |
| SPM               | mg/m <sup>3</sup> |                      | 0.10  | 0.20   | May 8, 1973       | 1292 (1294)                                 | 384 (384) |
| Ox                | ppm               |                      |       | 0.06   | May 8, 1973       | 1 (1155)                                    | 0 (28)    |
| NO <sub>2</sub>   | ppm               |                      | 0.06  |        | July 11, 1978     | 1233 (1233)                                 | 390 (391) |
| SO <sub>2</sub>   | ppm               |                      | 0.04  | 0.1    | May 16, 1973      | 947 (948)                                   | 49 (49)   |
| CO                | ppm               |                      | 10    | 20     | May 8, 1973       | 56 (56)                                     | 226 (226) |

Note:

(1) as of 2018

Table S1-2 compares the air quality standards of Japan, the U.S. and Europe, and the WHO guidelines for particulate matter (PM<sub>2.5</sub>, PM<sub>10</sub>, SPM) and gaseous components (O<sub>3</sub>, NO<sub>2</sub>) [S2][S3][S4]. The unit of particulate matter is unified as µg/m<sup>3</sup>, and the concentration unit for gaseous components is unified as ppb. Among gaseous substances, the following conversions are used for substances for which the ambient air quality standard is expressed in µg/m<sup>3</sup> (assuming 20°C and 1 atm).

O<sub>3</sub>: 1 ppb = 1.997 µg/m<sup>3</sup>, NO<sub>2</sub>: 1 ppb = 1.913 µg/m<sup>3</sup>

The percentile values in the table represent the percentile of the annual measurement results in ascending order. For example, in the case of the 98th percentile value of the daily concentration, the eighth highest value among the 365 daily concentration data per year must not exceed the air quality standard. The notation "n.a." indicates that there is no such tolerance setting.

**Table S1-2** Comparison of air quality standards (particulate matter and gaseous component) among Japan, the United States, Europe, and WHO guidelines

| Species                |        | Japan                 |      | US                    |       | Europe                             |      | WHO                                |      |
|------------------------|--------|-----------------------|------|-----------------------|-------|------------------------------------|------|------------------------------------|------|
| PM <sub>2.5</sub>      | annual | 15 µg/m <sup>3</sup>  | mean | 12 µg/m <sup>3</sup>  | mean  | 25 µg/m <sup>3</sup>               | mean | 10 µg/m <sup>3</sup>               | mean |
|                        | daily  | 35 µg/m <sup>3</sup>  | 98%  | 35 µg/m <sup>3</sup>  | 98%   | —                                  | —    | 25 µg/m <sup>3</sup>               | 99%  |
| PM <sub>10</sub> , SPM | annual | —                     | —    | —                     | —     | 40 µg/m <sup>3</sup>               | mean | 20 µg/m <sup>3</sup>               | mean |
|                        | daily  | 100 µg/m <sup>3</sup> | 98%  | 150 µg/m <sup>3</sup> | 99.7% | 50 µg/m <sup>3</sup>               | 90%  | 50 µg/m <sup>3</sup>               | 99%  |
| O <sub>3</sub>         | hourly | 60 ppb                | n.a. | —                     | —     | —                                  | —    | —                                  | —    |
|                        | 8-hour | —                     | —    | 70 ppb                | 99%   | 60 ppb<br>(120 µg/m <sup>3</sup> ) | 93%  | 50 ppb<br>(100 µg/m <sup>3</sup> ) | n.a. |
| NO <sub>2</sub>        | annual | —                     | —    | 53 ppb                | mean  | 21 ppb<br>(40 µg/m <sup>3</sup> )  | mean | 21 ppb<br>(40 µg/m <sup>3</sup> )  | mean |
|                        | daily  | 60 ppb                | 98%  | —                     | —     | —                                  | —    | —                                  | —    |

From this table, the air quality standards for particulate matter (PM<sub>2.5</sub>, PM<sub>10</sub>, and SPM) can be compared with each other because the definition of averaged time for all of them is almost the same (e.g. annual average), although the definitions for PM<sub>10</sub> and SPM are not completely identical. However, it is difficult to directly compare the standard values of O<sub>3</sub> and NO<sub>2</sub> in each region because the averaged time of the standard values is different. For example, O<sub>3</sub> is defined by 1-hour and 8-hour averaged values, and NO<sub>2</sub> is defined by annual and daily averaged values. Therefore, in order to be able to compare the air quality standards of O<sub>3</sub> and NO<sub>2</sub> in each region, we used the air pollutant concentration data in Japan and calculated different indices from the same air pollutant concentration database to investigate the relationship between them.

The left panel of Figure S1 plots the annual maximum hourly concentration and the annual 4th highest daily maximum of the 8-hour concentration (A4MDA8) of O<sub>3</sub> from the data of air pollutant concentrations at the AAQMS and RsAQMS in Japan from 1990 to 2017 (n=26,882). The right figure of Figure S2 also shows the relationship between the annual 98% value of the daily mean concentration of NO<sub>2</sub> and the annual mean value of NO<sub>2</sub> (n=51,398). The red rectangles in the figures indicate values that fall between 55 ppb and 65 ppb on the horizontal axis, a range roughly equivalent to Japan's air quality standards for O<sub>3</sub> and NO<sub>2</sub>.

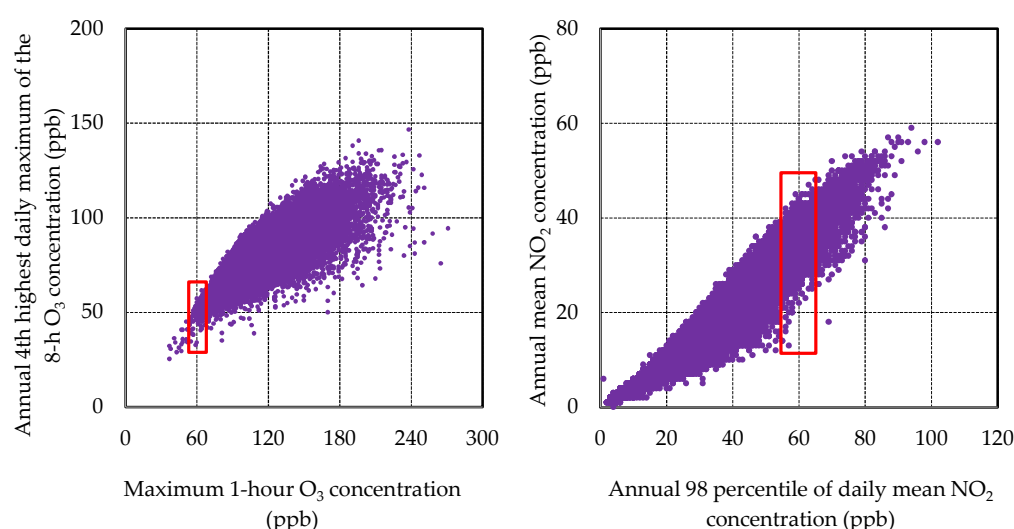

**Figure S1.** Conversion of air quality standards for O<sub>3</sub> (left figure) and NO<sub>2</sub> (right figure) (horizontal axis: Japanese air quality standards, vertical axis: European and U. S. air quality standards and WHO air quality guidelines)

From these figures, it can be seen that there is a relationship between the respective indices of O<sub>3</sub> and NO<sub>2</sub>, although the variation is large. Averaging the data included in the red rectangle, mean concentration of A4MDA8 was  $50.3 \pm 5.3$  (ppb). This value is lower

than the air quality standards of the United States and Europe, and is almost equivalent to the WHO guidelines. These results indicate that the air quality standards for  $O_3$  in Japan are more stringent than those in the United States and Europe. This is thought to be one of the reasons why there are almost no stations in Japan that comply with the air quality standards for  $O_3$ . However, the percentage of stations in Japan where the A4MDA8 concentration is less than 70 ppb, which is equivalent to the U.S. air quality standard, is only about 10% [S5], so a further reduction of  $O_3$  concentration is necessary. Similarly, averaging the  $NO_2$  concentrations enclosed in the red squares, the mean annual  $NO_2$  concentration was  $33.7 \pm 4.4$  ppb. This value was found to be lower than the U.S. air quality standards, but higher than the European air quality standards and WHO guidelines.

## S2 Supplement to figure 1 in main text

Figure 1 in main text shows a map of the distributions of ambient air quality monitoring stations (AAQMS) and roadside air quality monitoring stations (RsAQMS) and Figure S2 shows example photos of an AAQMS and a RsAQMS [S6].

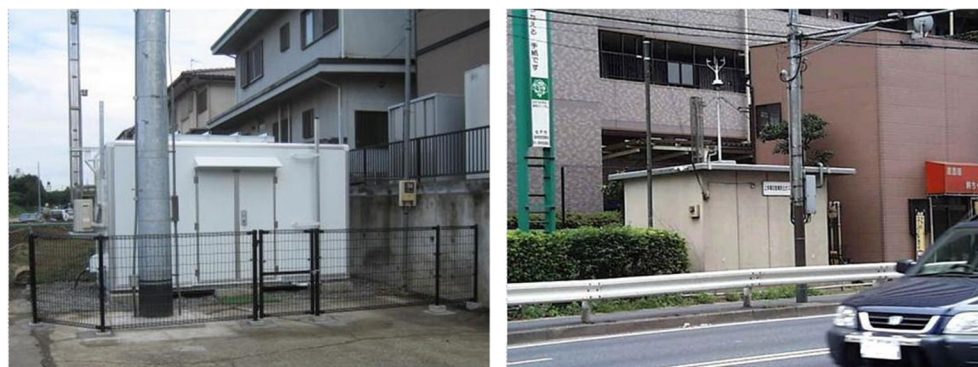

**Figure S2.** Photographs of an ambient air quality monitoring station (AAQMS) and a roadside air quality monitoring station (RsAQMS) [6]

Figure 1 in main text also shows the positional relationship from Region 1 to Region 8 considering the geographical commonality of Japan. The characteristics of each area are as follows:

Region 1 (Tohoku/Hokkaido) A region with a high latitude.

Region 2 (Kanto) An area that includes Tokyo, the capital, and surrounding prefectures and which has a concentration of economic activities.

Region 3 (Chubu) A mountainous area in the center of Japan and the area to the north of the mountains.

Region 4 (Tokai) Including Nagoya City, which is one of Japan's three major metropolitan areas, a mountainous area in the center of Japan and the plains on the south side.

Region 5 (Kinki) Japan's second largest commercial area, including the metropolis of Osaka City.

Region 6 (Chugoku) An area that is easily affected by trans-boundary air pollutants from the Asian continent because it is located close to the continent.

Region 7 (Shikoku) Surrounded by high mountains to the north and south, it is a climatically mild region, but it is susceptible to the emissions of vessels in the region.

Region 8 (Kyushu/Okinawa). An area which is affected by trans-boundary transportation from the Asian continent.

## S3 PM<sub>2.5</sub> concentrations (annual average concentrations) in South Korea and China

Figure S3 shows the PM<sub>2.5</sub> concentrations (annual average concentrations) at three sites in South Korea and five sites in China from 2010 to 2019 [S7].

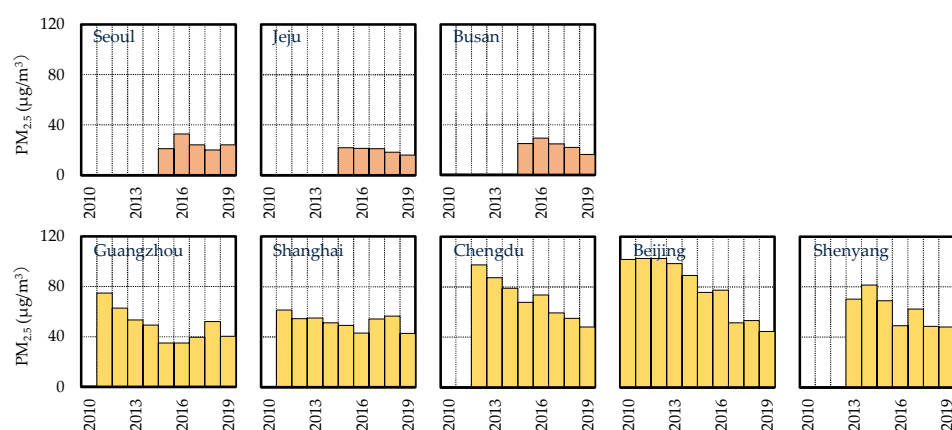

**Figure S3.** Annual average PM<sub>2.5</sub> concentration in cities in South Korea and China

#### S4 Ozone and related substances (nitrogen oxides, non-methane hydrocarbons)

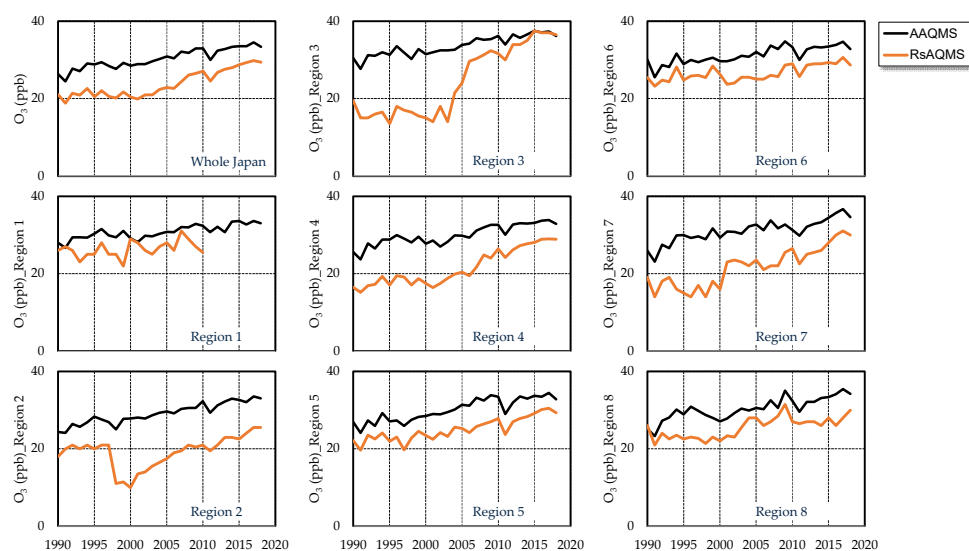

**Figure S4-1.** Annual average of 1-hour daytime ozone concentrations at the AAQMS and RsAQMS of the nation and each region from 1990 to 2018

**Table S4-1.** Annual average of 1-hour daytime ozone concentrations at the AAQMS for 1990–1992 and 2016–2018, averaged by region, and their ratios

| Ozone       | Concentration (ppb) |           | $C_{2016-2018} / C_{1990-1992}$ |
|-------------|---------------------|-----------|---------------------------------|
|             | 1990–1992           | 2016–2018 |                                 |
| Whole Japan | 26.2                | 33.8      | 1.29                            |
| Region 1    | 28.0                | 33.1      | 1.18                            |
| Region 2    | 25.0                | 32.9      | 1.32                            |
| Region 3    | 29.8                | 36.9      | 1.24                            |
| Region 4    | 25.7                | 33.5      | 1.30                            |
| Region 5    | 26.1                | 33.6      | 1.29                            |
| Region 6    | 28.1                | 33.8      | 1.20                            |
| Region 7    | 25.5                | 35.6      | 1.40                            |
| Region 8    | 25.2                | 34.6      | 1.37                            |

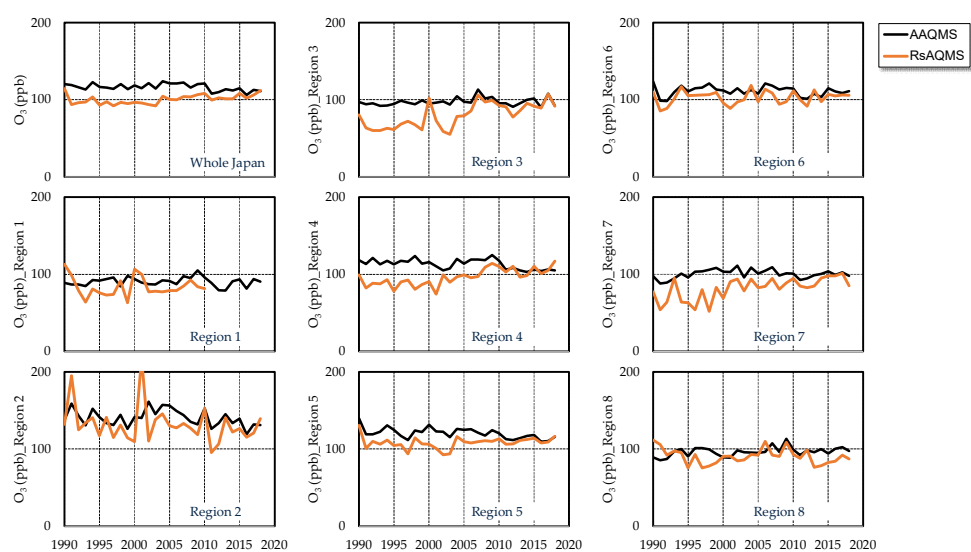

**Figure S4-2.** Annual maximum 1-hour daytime ozone concentrations at the AAQMS and RsAQMS averaged by region from 1990 to 2018

**Table S4-2.** Annual maximum daytime 1-hour ozone concentrations at the AAQMS for 1990–1992 and 2016–2018, averaged by region, and their ratios

| Ozone<br>AAQMS | Concentration (ppb) |           | $C_{2016-2018} / C_{1990-1992}$ |
|----------------|---------------------|-----------|---------------------------------|
|                | 1990~1992           | 2016~2018 |                                 |
| Whole Japan    | 118.5               | 109.9     | 0.93                            |
| Region 1       | 87.5                | 88.5      | 1.01                            |
| Region 2       | 146.5               | 127.3     | 0.87                            |
| Region 3       | 95.6                | 96.6      | 1.01                            |
| Region 4       | 117.7               | 105.3     | 0.90                            |
| Region 5       | 125.8               | 111.8     | 0.89                            |
| Region 6       | 106.8               | 110.1     | 1.03                            |
| Region 7       | 91.6                | 99.9      | 1.09                            |
| Region 8       | 87.3                | 100.0     | 1.15                            |

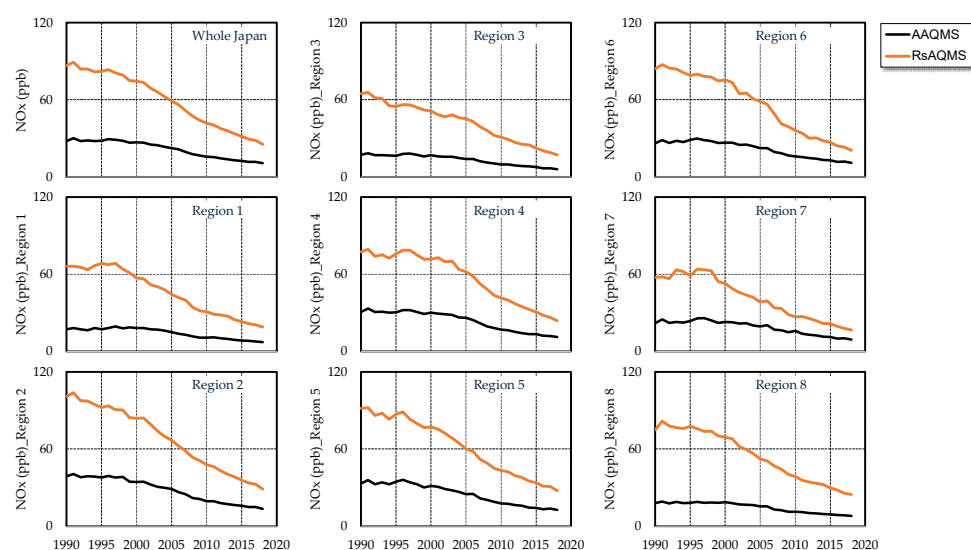

**Figure S4-3** Annual average NO<sub>x</sub> concentrations at the AAQMS and RsAQMS of the nation and each region from 1990 to 2018

**Table S4-3** Annual average NO<sub>x</sub> concentrations at the AAQMS and RsAQMS of the nation and each region in 1990, 2000, 2010 and 2018, and the ratio of concentrations in 2018 to 1990

| NO <sub>x</sub> |        | Concentration (ppb) |      |      |      | $C_{2018} / C_{1990}$ |
|-----------------|--------|---------------------|------|------|------|-----------------------|
|                 |        | 1990                | 2000 | 2010 | 2018 |                       |
| Whole Japan     | AAQMS  | 28                  | 27   | 16   | 11   | 0.38                  |
|                 | RsAQMS | 87                  | 74   | 42   | 25   | 0.29                  |
| Region 1        | AAQMS  | 17                  | 18   | 11   | 7    | 0.42                  |
|                 | RsAQMS | 66                  | 57   | 31   | 19   | 0.29                  |
| Region 2        | AAQMS  | 39                  | 34   | 19   | 14   | 0.35                  |
|                 | RsAQMS | 101                 | 84   | 48   | 29   | 0.29                  |
| Region 3        | AAQMS  | 17                  | 17   | 10   | 6    | 0.35                  |
|                 | RsAQMS | 65                  | 51   | 31   | 17   | 0.26                  |
| Region 4        | AAQMS  | 31                  | 30   | 17   | 11   | 0.37                  |
|                 | RsAQMS | 77                  | 72   | 42   | 24   | 0.31                  |
| Region 5        | AAQMS  | 33                  | 31   | 18   | 13   | 0.38                  |
|                 | RsAQMS | 92                  | 77   | 43   | 27   | 0.30                  |
| Region 6        | AAQMS  | 26                  | 26   | 16   | 11   | 0.41                  |
|                 | RsAQMS | 84                  | 75   | 36   | 21   | 0.24                  |
| Region 7        | AAQMS  | 22                  | 23   | 16   | 9    | 0.42                  |
|                 | RsAQMS | 58                  | 53   | 27   | 17   | 0.29                  |
| Region 8        | AAQMS  | 18                  | 19   | 11   | 8    | 0.45                  |
|                 | RsAQMS | 75                  | 69   | 39   | 25   | 0.33                  |

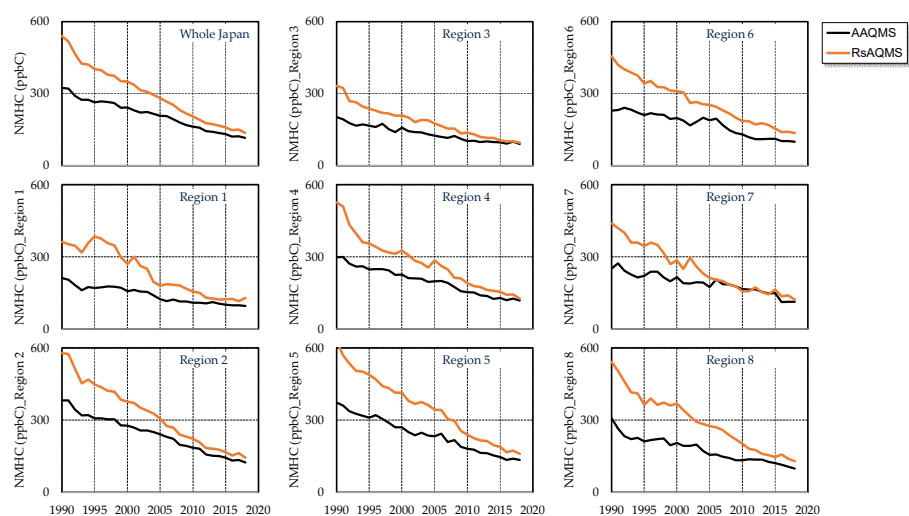

**Figure S4-41** Annual average NMHC concentrations at the AAQMS and RsAQMS of the nation and each region from 1990 to 2018

**Table S4-4** Annual average concentration of NMHC at the AAQMS and RsAQMS of the nation and each region in 1990, 2000, 2010 and 2018, and the ratio of concentrations in 2018 to 1990 and 2010 to 2000

| NMHC        |        | Concentration (ppbC) |      |      |      | $C_{2018} / C_{1990}$ $C_{2018} / C_{2000}$ |      |
|-------------|--------|----------------------|------|------|------|---------------------------------------------|------|
|             |        | 1990                 | 2000 | 2010 | 2018 |                                             |      |
| Whole Japan | AAQMS  | 324                  | 242  | 163  | 116  | 0.36                                        | 0.67 |
|             | RsAQMS | 539                  | 350  | 205  | 138  | 0.26                                        | 0.59 |
| Region 1    | AAQMS  | 211                  | 158  | 110  | 96   | 0.45                                        | 0.69 |
|             | RsAQMS | 363                  | 270  | 156  | 129  | 0.36                                        | 0.58 |
| Region 2    | AAQMS  | 383                  | 277  | 186  | 124  | 0.32                                        | 0.67 |
|             | RsAQMS | 580                  | 377  | 222  | 145  | 0.25                                        | 0.59 |
| Region 3    | AAQMS  | 203                  | 159  | 103  | 91   | 0.45                                        | 0.65 |
|             | RsAQMS | 333                  | 210  | 138  | 96   | 0.29                                        | 0.65 |
| Region 4    | AAQMS  | 299                  | 227  | 153  | 119  | 0.40                                        | 0.67 |
|             | RsAQMS | 526                  | 326  | 191  | 126  | 0.24                                        | 0.58 |
| Region 5    | AAQMS  | 373                  | 271  | 181  | 135  | 0.36                                        | 0.67 |
|             | RsAQMS | 630                  | 414  | 239  | 159  | 0.25                                        | 0.58 |
| Region 6    | AAQMS  | 229                  | 199  | 131  | 100  | 0.44                                        | 0.66 |
|             | RsAQMS | 456                  | 309  | 187  | 136  | 0.30                                        | 0.61 |
| Region 7    | AAQMS  | 252                  | 215  | 166  | 113  | 0.45                                        | 0.77 |
|             | RsAQMS | 440                  | 285  | 157  | 123  | 0.28                                        | 0.55 |
| Region 8    | AAQMS  | 307                  | 205  | 134  | 98   | 0.32                                        | 0.65 |
|             | RsAQMS | 542                  | 369  | 202  | 130  | 0.24                                        | 0.55 |

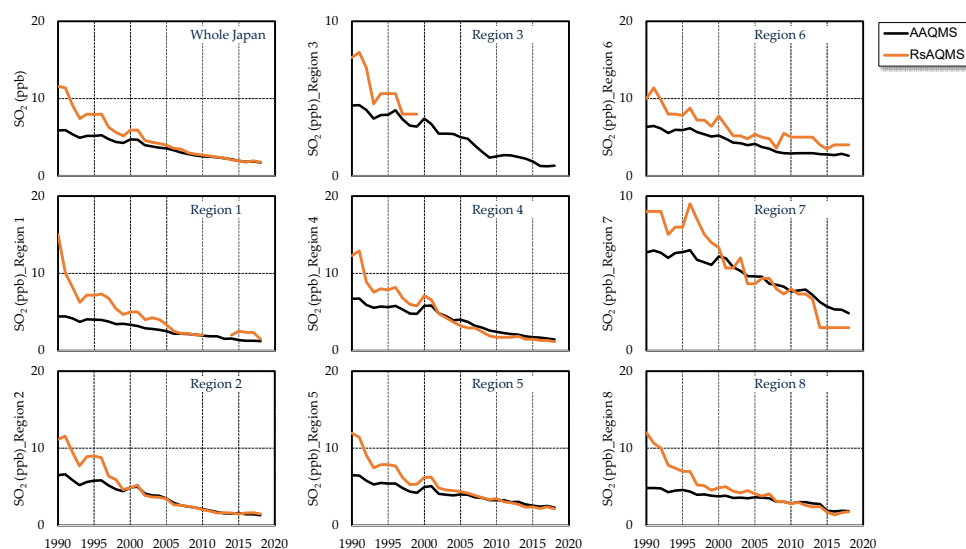

**Figure 2** Annual average SO<sub>2</sub> concentrations at the AAQMS and RsAQMS of the nation and each region from 1990 to 2018

**Table S4-5** Annual average concentration of SO<sub>2</sub> at the AAQMS and RsAQMS of the nation and each region in 1990, 2000, 2010 and 2018, and the ratio of concentrations in 2018 to 1990

| SO <sub>2</sub> |        | Concentration (ppb) |      |      |      | C <sub>2018</sub> / C <sub>1990</sub> |
|-----------------|--------|---------------------|------|------|------|---------------------------------------|
|                 |        | 1990                | 2000 | 2010 | 2018 |                                       |
| Whole Japan     | AAQMS  | 5.9                 | 4.7  | 2.5  | 1.7  | 0.29                                  |
|                 | RsAQMS | 11.6                | 5.9  | 2.7  | 1.8  | 0.15                                  |
| Region 1        | AAQMS  | 4.4                 | 3.3  | 2.0  | 1.2  | 0.28                                  |
|                 | RsAQMS | 15.0                | 5.0  | 2.0  | 1.5  | 0.10                                  |
| Region 2        | AAQMS  | 6.5                 | 4.9  | 2.1  | 1.3  | 0.20                                  |
|                 | RsAQMS | 11.2                | 4.9  | 2.0  | 1.5  | 0.13                                  |
| Region 3        | AAQMS  | 4.5                 | 3.7  | 1.3  | 0.7  | 0.15                                  |
|                 | RsAQMS | 7.7                 | --   | --   | --   | --                                    |
| Region 4        | AAQMS  | 6.7                 | 5.8  | 2.4  | 1.4  | 0.22                                  |
|                 | RsAQMS | 12.3                | 7.1  | 1.7  | 1.2  | 0.09                                  |
| Region 5        | AAQMS  | 6.5                 | 5.0  | 3.3  | 2.3  | 0.36                                  |
|                 | RsAQMS | 11.9                | 6.2  | 3.5  | 2.1  | 0.18                                  |
| Region 6        | AAQMS  | 6.3                 | 5.2  | 2.9  | 2.6  | 0.41                                  |
|                 | RsAQMS | 10.0                | 7.8  | 5.0  | 4.0  | 0.40                                  |
| Region 7        | AAQMS  | 6.4                 | 6.1  | 3.8  | 2.4  | 0.38                                  |
|                 | RsAQMS | 9.0                 | 6.7  | 4.0  | 1.5  | 0.17                                  |
| Region 8        | AAQMS  | 4.8                 | 3.8  | 2.8  | 1.9  | 0.38                                  |
|                 | RsAQMS | 12.0                | 4.9  | 2.8  | 1.8  | 0.15                                  |

## References

1. Air Pollution Status in Fiscal Year 2018 (Ministry of the Environment). Available online: [https://www.env.go.jp/air/osen/jokyo\\_h30/index.html](https://www.env.go.jp/air/osen/jokyo_h30/index.html) (accessed on 10 June 2021)
2. Air quality monitoring stations (Environmental conservation division, Environment department, Matsudo City). Available online: <https://www.city.matsudo.chiba.jp/jigyosya/seikatu/taiki/tyousa/haitizu.html> (accessed on 10 June 2021)
3. NAAQS table (United States Environmental Protection Agency). Available online: <https://www.epa.gov/criteria-air-pollutants/naaqs-table> (accessed on 10 June 2021)
4. Air Quality Standards (European Commission). Available online: <https://ec.europa.eu/environment/air/quality/standards.htm> (accessed on 10 June 2021)

- 
5. World Health Organization, Air Quality Guidelines for particulate matter, ozone, nitrogen dioxide and sulfur dioxide. Global update 2005. Summary of risk assessment. Available online : [http://www.who.int/phe/health\\_topics/outdoorair\\_aqg/en/index.html](http://www.who.int/phe/health_topics/outdoorair_aqg/en/index.html) (accessed on 10 June 2021)
  6. Hayasaki, M. Nationwide Characteristics of Photochemical Oxidant in Japan by using the US EPA National Air Quality Standard, *JARI Research Journal* **2019** (in Japanese)
  7. Atmospheric Environmental Regional Observation System : AEROS (Ministry of the Environment). Available online: <https://sorame.env.go.jp/> (accessed on 10 June 2021)
